# Supplementary material
Source: publisher figshare collection journal article supplement (https://karger.figshare.com/ndownloader/files/21818241)
Supplement: Supplementary file 1 [file 21818241]

**AVVH Pilot – Treatment Data Survey**

**Date_______________ RN Name________________________________ Unit___________________________________**

**Patient Name_________________________ Patient MRN_______________________ AVVH Treatment # __________**

**Patient:**

- Admitting Diagnosis: ____________________________________________________________
- Catheter Placement:  Right IJ  Left IJ  Femoral  Subclavian
- Vasopressor(s): ________________________________________________________________

**Therapy:** AVVH (Accelerated Veno-Venous Hemofiltration)

- BFR: *Prescribed* _________ mL/min *Achieved* _________ mL/min
- Therapy fluid rate: _________ L/hour
- Therapy time: *Planned*: ________ hours *Achieved* _________ hours
- Therapy fluid formulation:  4K/2.5Ca  Other __________
- Last Treatment: Date ________ Time Terminated _________ Type:  CVVH  AVVH  IHD

**Outcomes:**

|  | **Pre-Treatment** | **Post-Treatment** |
| --- | --- | --- |
| Sodium (mEq/L) |  |  |
| Potassium (mEq/L) |  |  |
| Bicarbonate (mEq/L) |  |  |
| BUN (mg/dL) |  |  |
| Serum Creatinine (mg/dL) |  |  |
| Calcium (mg/dL) |  |  |
| Ionized Calcium (iCa) |  |  |
| Phosphorus (mg/dL) |  |  |
| SBP |  |  |
| DBP |  |  |
| MAP |  |  |
| Weight (kg) |  |  |
| Net Fluid Removed (L) |  |  |

**Repletion:**

- Potassium Repletion Required:  Yes  No If Yes, How much? __________________
- Calcium Repletion Required:  Yes  No If Yes, How much? __________________
- Phosphorus Repletion Required:  Yes  No If Yes, How much? __________________

**Time Off Treatment:**  None  Yes (if so, how long?) ________ hours

- Was the machine downtime due to:  Clotting  Planned Procedure  Other _______________

**Nursing Feedback**

- Was a history/event review done at the end of treatment?  Yes  No
  - If Yes, please list any alarm conditions that occurred more than once: ____________________________________________________________________________________________________________________________________________________
- Comments: ________________________________________________________________________________________________________________________________________________________________________________________________________________________________________________
